# Supplementary material for: Dispensable genome and segmental duplications drive the genome plasticity in Fusarium solani
Source: Front Fungal Biol. 2025 Feb 5;6:1432339. doi: 10.3389/ffunb.2025.1432339 (PMC11835900; doi:10.3389/ffunb.2025.1432339)
Supplement: Supplementary file 1 [file Table1.xlsx]

## Sheet: Supp Table 1
Supplementary Table 1. Genomic features of 15 Fusarium solani strain SB1 chromosomes. Chromosomes in bold are not found in the reference genome F. vanettenii strain 77-13-4.
Chr No.	Size (Mb)	GC (%)	Total Repeat Families (%)*	Number of Telomeric Repeats*	Predictions and Annotations*
					Protein-coding Genes	Average Gene Density per Mb	Secondary Metabolites	Secreted Proteins	CAZymes	Effectors	PHI
Chr01	6.54	52.55	1.23	29	2039	312	6	96	26	35	15
Chr02	4.69	51.74	0.93	23	1516	323	4	78	22	23	8
Chr03	5.1	50.53	1.17	28	1574	309	6	113	36	32	7
Chr04	5.89	52.05	1.21	27	1804	306	2	98	28	37	13
Chr05	4.12	51.84	0.97	0	1343	326	1	68	21	28	10
Chr06	4.03	49.59	5.3	25	1275	316	5	66	23	25	8
Chr07	3.39	48.39	5.04	26	1174	346	6	144	35	62	19
Chr08	3.49	51.23	1.02	33	1144	328	2	82	17	28	8
Chr09	3.24	51.09	1.11	25	1056	326	0	72	19	22	10
Chr10	2.94	50.65	0.84	0	973	331	1	66	13	27	4
Chr11	2.74	47.71	3.38	23	914	334	4	93	28	38	9
Chr12	2.89	48.34	1.19	28	1033	357	3	120	24	50	18
Chr13	4.44	50.6	26.34	27	913	206	0	21	3	6	4
Chr14	3.73	50.32	21	26	719	193	0	20	7	6	5
Chr15	2.11	48.82	9.66	28	512	243	1	40	6	21	3
Total	59.34	/	/	/	17989	303	41	1177	309	440	141
*Details are available in the Methodology section.

## Sheet: Supp Table 2
Supplementary Table 2. PHI Genes hits of F. solani SB1
# Fields: query id	subject id	PHI_MolConn_ID	gene_name	pathogen_id	pathogen_species	mutant_phenotype	% identity	alignment length	mismatches	gap opens	q. start	q. end	s. start	s. end	evalue	bit score
SB1_chr01_pep_22	Q96TN6	PHI:256	GAS1	318829	Magnaporthe_oryzae	reduced_virulence	62	200	74	2	1	199	20	218	3e-83	253
SB1_chr01_pep_75	I1RH33	PHI:5901	FGSG_03072	5518	Fusarium_graminearum	unaffected_pathogenicity	80.24	587	99	6	1	577	21	600	0	971
SB1_chr01_pep_123	Q6IVV6	PHI:547	CEL5A	40559	Botrytis_cinerea	unaffected_pathogenicity	53.75	307	141	1	3	308	118	424	3e-122	359
SB1_chr01_pep_197	T2C7K6	PHI:3226	Pnl1	36651	Penicillium_digitatum	reduced_virulence	58.39	310	124	4	5	311	25	332	9e-117	345
SB1_chr01_pep_203	Q5XTQ4	PHI:541	LIP1	40559	Botrytis_cinerea	unaffected_pathogenicity	58.41	553	223	6	7	554	19	569	0	650
SB1_chr01_pep_255	Q00298	PHI:69	CUTA	40559	Botrytis_cinerea	unaffected_pathogenicity	50.31	159	78	1	15	172	30	188	9e-47	154
SB1_chr01_pep_362	A7EB00	PHI:3936	Ss-caf1	5180	Sclerotinia_sclerotiorum	loss_of_pathogenicity	56.83	183	78	1	1	182	21	203	2e-71	217
SB1_chr01_pep_600	A0A194VQ92	PHI:10219	FAEA1_(VM1G_01793)	105487	Valsa_mali	reduced_virulence	57.07	382	137	7	5	373	40	407	4e-135	395
SB1_chr01_pep_872	G4ZRT3	PHI:10659	PsGH7a	67593	Phytophthora_sojae	reduced_virulence	51.13	442	206	6	1	434	25	464	2e-154	450
SB1_chr01_pep_1212	G4MRS8	PHI:816	MGG_04582	318829	Magnaporthe_oryzae	reduced_virulence	50	268	131	2	323	588	273	539	4e-91	293
SB1_chr01_pep_1642	I1RB96	PHI:5886	FGSG_00806	5518	Fusarium_graminearum	unaffected_pathogenicity	79.12	388	79	2	2	389	28	413	0	581
SB1_chr01_pep_1702	A0A1C3YLW9	PHI:5892	FGSG_09382	5518	Fusarium_graminearum	unaffected_pathogenicity	72.37	427	110	3	1	420	21	446	0	601
SB1_chr01_pep_1789	Q96VZ3	PHI:181	PGX1	5507	Fusarium_oxysporum	unaffected_pathogenicity	52.67	412	189	3	4	409	30	441	1e-147	430
SB1_chr01_pep_1954	I1S1C5	PHI:5893	FGSG_10525	5518	Fusarium_graminearum	unaffected_pathogenicity	62.01	379	140	2	10	387	22	397	5e-166	473
SB1_chr01_pep_2018	Q8NJ73	PHI:2043	XYL-6	318829	Magnaporthe_oryzae	unaffected_pathogenicity	65.62	32	11	0	393	424	22	53	3e-09	57
SB1_chr07_pep_2252	Q96VZ3	PHI:181	PGX1	5507	Fusarium_oxysporum	unaffected_pathogenicity	56.31	412	176	2	11	418	32	443	3e-165	475
SB1_chr07_pep_2257	Q04701	PHI:179	PELA	169388	Fusarium_solani	reduced_virulence	52.5	200	91	4	22	218	23	221	3e-63	199
SB1_chr07_pep_2318	Q0R411	PHI:6417	Sm1	29875	Trichoderma_virens	reduced_virulence	73.95	119	31	0	2	120	20	138	2e-60	184
SB1_chr07_pep_2362	A0A1B5KZM5	PHI:10357__PHI:10826	UvHrip1_(UVI_02019870)	1159556	Ustilaginoidea_virens	effector_(plant_avirulence_determinant)	70.23	131	39	0	3	133	20	150	3e-68	205
SB1_chr07_pep_2393	O93976	PHI:2364	Tom1	5507	Fusarium_oxysporum	reduced_virulence__increased_virulence_(hypervirulence)	74.12	313	80	1	7	319	21	332	5e-173	486
SB1_chr07_pep_2436	A0A194W2D2	PHI:10223	FAEC3_(VM1G_06347)	105487	Valsa_mali	unaffected_pathogenicity	51.6	469	218	3	3	467	35	498	2e-167	509
SB1_chr07_pep_2474	Q2VLJ1	PHI:716	ZEB1	5518	Fusarium_graminearum	unaffected_pathogenicity	52.1	547	262	0	2	548	17	563	0	623
SB1_chr07_pep_2574	Q5KAG0	PHI:4197	LHC1	5207	Cryptococcus_neoformans	reduced_virulence	62.37	372	140	0	4	375	101	472	3e-170	487
SB1_chr07_pep_2609	I1RU98	PHI:6126__PHI:5751	FGSG_07783__ScOrtholog_DIA3	5518	Fusarium_graminearum	unaffected_pathogenicity__reduced_virulence	79.18	437	86	2	1	432	22	458	0	733
SB1_chr07_pep_2628	Q00845	PHI:180	PELD	169388	Fusarium_solani	reduced_virulence	99.07	215	2	0	1	215	19	233	4e-157	437
SB1_chr07_pep_2826	Q7ZA48	PHI:323	VFGLU1	93591	Lecanicillium_fungicola	reduced_virulence	61.22	410	151	6	1	410	17	418	0	519
SB1_chr07_pep_2894	I1RXJ5	PHI:9242	Fghyd3_(FGSG_09066)	5518	Fusarium_graminearum	reduced_virulence	53.97	63	28	1	27	89	21	82	1e-17	71.2
SB1_chr07_pep_2903	I1S1J0	PHI:5894	FGSG_10595	5518	Fusarium_graminearum	unaffected_pathogenicity	58.47	366	147	2	14	379	25	385	1e-149	431
SB1_chr07_pep_2912	G4N8Y3	PHI:3213	MoCDIP1	318829	Magnaporthe_oryzae	effector_(plant_avirulence_determinant)	70.15	335	98	2	2	335	22	355	2e-159	453
SB1_chr07_pep_2934	Q00845	PHI:180	PELD	169388	Fusarium_solani	reduced_virulence	55.19	212	80	6	7	215	26	225	5e-67	207
SB1_chr07_pep_2953	Q00845	PHI:180	PELD	169388	Fusarium_solani	reduced_virulence	50.47	212	95	4	21	227	27	233	7e-58	189
SB1_chr07_pep_3071	G4N3U4	PHI:5188	MoHPX1	318829	Magnaporthe_oryzae	reduced_virulence	52.58	213	94	4	4	212	33	242	2e-64	201
SB1_chr07_pep_3157	Q2VLJ1	PHI:716	ZEB1	5518	Fusarium_graminearum	unaffected_pathogenicity	60.29	544	212	1	5	548	24	563	0	702
SB1_chr07_pep_3212	G4N4F9	PHI:2166__PHI:6390	CBP1	318829	Magnaporthe_oryzae	unaffected_pathogenicity	55.32	47	18	2	224	269	406	450	2e-06	47
SB1_chr05_pep_3257	I1S2L3	PHI:7283	Pg1	5518	Fusarium_graminearum	reduced_virulence__unaffected_pathogenicity	91.04	335	30	0	1	335	25	359	0	614
SB1_chr05_pep_3577	Q8NJS2	PHI:697	Ugt51E1	5022	Leptosphaeria_maculans	unaffected_pathogenicity	70.98	379	107	2	2	378	19	396	0	579
SB1_chr05_pep_3625	I1RX03	PHI:3985	FGSG_08844_(Sc_gpi7)	5518	Fusarium_graminearum	unaffected_pathogenicity	50.85	59	18	1	20	78	454	501	6e-07	49.7
SB1_chr05_pep_3666	O59928	PHI:144	CHT42	29875	Trichoderma_virens	reduced_virulence	64.13	407	139	2	2	401	24	430	0	555
SB1_chr05_pep_3750	Q04701	PHI:179	PELA	169388	Fusarium_solani	reduced_virulence	69.57	230	70	0	150	379	13	242	3e-119	348
SB1_chr05_pep_4134	G4MKI0	PHI:2118__PHI:5540	MgSM1__MSP1	318829	Magnaporthe_oryzae	effector_(plant_avirulence_determinant)__increased_virulence_(hypervirulence)	60.83	120	46	1	1	120	19	137	2e-49	156
SB1_chr05_pep_4218	I1S0V3	PHI:5902	FGSG_10343	5518	Fusarium_graminearum	unaffected_pathogenicity	53.27	612	240	6	2	589	23	612	0	664
SB1_chr05_pep_4275	A9QUB2	PHI:2403	CSN1	169388	Fusarium_solani	increased_virulence_(hypervirulence)__reduced_virulence	50.41	121	60	0	3	123	22	142	5e-40	136
SB1_chr05_pep_4338	G2X4G0	PHI:11606	Vd424Y	27337	Verticillium_dahliae	effector_(plant_avirulence_determinant)	79.79	188	38	0	1	188	36	223	6e-107	308
SB1_chr05_pep_4436	I1R9N9	PHI:5881	PRB1	5518	Fusarium_graminearum	reduced_virulence	86.38	514	64	3	6	514	21	533	0	914
SB1_chr12_pep_4611	X0J8P9	PHI:5393	GLX	5507	Fusarium_oxysporum	reduced_virulence	77.94	902	179	3	1	902	21	902	0	1492
SB1_chr12_pep_4733	A0A098DJU9	PHI:9062__PHI:10449	KatG2_(FGSG_12369)__FCA7_(FGSG_12369)	5518	Fusarium_graminearum	reduced_virulence	80.42	756	147	1	3	758	20	774	0	1253
SB1_chr12_pep_4770	K9G4Z7	PHI:10923	PDIG_23520_(Sca)	36651	Penicillium_digitatum	unaffected_pathogenicity__increased_virulence_(hypervirulence)	65.52	116	37	1	5	120	35	147	4e-52	163
SB1_chr12_pep_4780	Q96VZ3	PHI:181	PGX1	5507	Fusarium_oxysporum	unaffected_pathogenicity	78.48	446	78	2	5	450	28	455	0	714
SB1_chr12_pep_4799	Q00845	PHI:180	PELD	169388	Fusarium_solani	reduced_virulence	77.67	215	46	1	1	213	19	233	3e-124	353
SB1_chr12_pep_4814	Q5KAG0	PHI:4197	LHC1	5207	Cryptococcus_neoformans	reduced_virulence	59.89	374	148	1	8	381	101	472	2e-164	472
SB1_chr12_pep_4817	I1S368	PHI:6127	PLC	5518	Fusarium_graminearum	unaffected_pathogenicity	80.77	598	115	0	3	600	50	647	0	1055
SB1_chr12_pep_4842	I1RU06	PHI:6124__PHI:5750	FGSG_07678__ScOrtholog_GIC1	5518	Fusarium_graminearum	reduced_virulence	83.58	408	67	0	5	412	17	424	0	693
SB1_chr12_pep_4886	Q0E7H5	PHI:2341	BeNEP1	278938	Botrytis_elliptica	unaffected_pathogenicity	58.45	219	88	1	10	225	27	245	1e-94	279
SB1_chr12_pep_4891	Q6IVV6	PHI:547	CEL5A	40559	Botrytis_cinerea	unaffected_pathogenicity	53.59	306	137	4	68	368	118	423	1e-113	340
SB1_chr12_pep_4964	K9G4Z7	PHI:10923	PDIG_23520_(Sca)	36651	Penicillium_digitatum	unaffected_pathogenicity__increased_virulence_(hypervirulence)	70.83	120	34	1	10	128	28	147	8e-58	178
SB1_chr12_pep_5031	I1RHV1	PHI:6123__PHI:5715	FGSG_03366__ScOrtholog_PHO12	5518	Fusarium_graminearum	reduced_virulence__unaffected_pathogenicity	74.79	468	113	2	6	473	23	485	0	766
SB1_chr12_pep_5033	G4N8Y3	PHI:3213	MoCDIP1	318829	Magnaporthe_oryzae	effector_(plant_avirulence_determinant)	75.22	335	83	0	1	335	21	355	7e-177	497
SB1_chr12_pep_5257	I1RHI8	PHI:6121	FGSG_03243	5518	Fusarium_graminearum	reduced_virulence	67.92	533	167	3	2	533	21	550	0	762
SB1_chr12_pep_5393	Q9C4A0	PHI:2817	Aapg1	5599	Alternaria_alternata	unaffected_pathogenicity	68.19	349	107	3	11	357	32	378	4e-156	446
SB1_chr12_pep_5451	I1RDQ0	PHI:9241	Fghyd2_(FGSG_01764)	5518	Fusarium_graminearum	reduced_virulence	52.17	115	47	2	3	110	24	137	2e-34	117
SB1_chr12_pep_5523	Q6WIH5	PHI:4970	MEP1	523103	Trichophyton_mentagrophytes	reduced_virulence	57.12	625	252	6	3	622	19	632	0	738
SB1_chr12_pep_5526	G8AA67	PHI:2476	CcpelA	27358	Colletotrichum_coccodes	reduced_virulence__increased_virulence_(hypervirulence)	61.25	271	101	3	16	283	56	325	3e-112	329
SB1_chr09_pep_5655	E3QFA7	PHI:10749	CLU5d_(GLRG_04689)	31870	Colletotrichum_graminicola	reduced_virulence	53.11	177	76	3	19	194	65	235	1e-52	177
SB1_chr09_pep_5795	A0A0C4DHY4	PHI:4880	Pgx6	5507	Fusarium_oxysporum	unaffected_pathogenicity__reduced_virulence	82.86	420	72	0	1	420	21	440	0	754
SB1_chr09_pep_5843	G4MXR2	PHI:8753__PHI:8806	MoChia1_(MGG_08054)__MoChi1_(MGG_08054)	318829	Magnaporthe_oryzae	reduced_virulence	58.86	367	146	3	8	370	29	394	3e-157	450
SB1_chr09_pep_5900	J4W023	PHI:7181	CypB	176275	Beauveria_bassiana	reduced_virulence	84.44	180	28	0	1	180	29	208	4e-112	320
SB1_chr09_pep_6003	Q00845	PHI:180	PELD	169388	Fusarium_solani	reduced_virulence	63.18	220	71	5	1	215	19	233	5e-88	261
SB1_chr09_pep_6349	G4ML12	PHI:6739	MoGls2	318829	Magnaporthe_oryzae	reduced_virulence	66.18	958	296	7	1	933	25	979	0	1342
SB1_chr09_pep_6381	A0A384JSB2	PHI:10365	BcBGL1_(BCIN_09g02640)	40559	Botrytis_cinerea	reduced_virulence	58.75	766	300	10	31	781	33	797	0	872
SB1_chr09_pep_6441	Q6WER3	PHI:432__PHI:4212__PHI:4242	FGL1__Fgl1	5518	Fusarium_graminearum	reduced_virulence	66.27	332	109	3	1	332	16	344	7e-162	459
SB1_chr09_pep_6513	X0MKY5	PHI:11176	FoEG1_(FOTG_02663)	5507	Fusarium_oxysporum	unaffected_pathogenicity__reduced_virulence	69.09	220	68	0	2	221	30	249	5e-109	316
SB1_chr09_pep_6608	Q8NJ73	PHI:2043	XYL-6	318829	Magnaporthe_oryzae	unaffected_pathogenicity	62.5	32	12	0	442	473	22	53	1e-07	52
SB1_chr11_pep_6816	I1RIQ3	PHI:1575	GzOB015	5518	Fusarium_graminearum	unaffected_pathogenicity	76.13	222	52	1	1	222	21	241	7e-123	351
SB1_chr11_pep_6932	I1RJ45	PHI:6120	FGSG_03846	5518	Fusarium_graminearum	reduced_virulence	70.12	425	104	2	3	404	22	446	0	621
SB1_chr11_pep_7016	A0A0C4DHY4	PHI:4880	Pgx6	5507	Fusarium_oxysporum	unaffected_pathogenicity__reduced_virulence	62.53	443	152	5	1	442	21	450	0	588
SB1_chr11_pep_7083	I1RHQ4	PHI:5898	FGSG_03315	5518	Fusarium_graminearum	unaffected_pathogenicity	60.2	402	148	1	2	403	22	411	7e-173	492
SB1_chr11_pep_7272	X0MKY5	PHI:11176	FoEG1_(FOTG_02663)	5507	Fusarium_oxysporum	unaffected_pathogenicity__reduced_virulence	69.82	222	65	2	1	221	29	249	3e-108	314
SB1_chr11_pep_7336	K9G4Z7	PHI:10923	PDIG_23520_(Sca)	36651	Penicillium_digitatum	unaffected_pathogenicity__increased_virulence_(hypervirulence)	65.12	129	44	1	1	128	19	147	5e-56	173
SB1_chr11_pep_7374	G4ZRT3	PHI:10659	PsGH7a	67593	Phytophthora_sojae	reduced_virulence	52.04	442	202	6	1	434	25	464	3e-161	473
SB1_chr11_pep_7436	Q04701	PHI:179	PELA	169388	Fusarium_solani	reduced_virulence	95.56	225	10	0	1	225	18	242	3e-159	443
SB1_chr11_pep_7438	I1RGU8	PHI:5897	FGSG_02976	5518	Fusarium_graminearum	unaffected_pathogenicity	82.42	364	64	0	2	365	26	389	0	615
SB1_chr06_pep_7620	Q99174	PHI:2849	CutA	169388	Fusarium_solani	unaffected_pathogenicity	98.51	201	3	0	1	201	30	230	2e-143	402
SB1_chr06_pep_7644	G4MVX4	PHI:3216	MoCDIP4	318829	Magnaporthe_oryzae	effector_(plant_avirulence_determinant)	70.59	34	10	0	284	317	262	295	4e-09	55.5
SB1_chr06_pep_7832	Q9C1F9	PHI:566	Cel2	5017	Bipolaris_zeicola	unaffected_pathogenicity	53.37	401	176	8	1	397	18	411	2e-143	418
SB1_chr06_pep_7835	Q5XTQ4	PHI:541	LIP1	40559	Botrytis_cinerea	unaffected_pathogenicity	52.94	544	248	5	1	542	31	568	0	564
SB1_chr06_pep_8027	G4NIS9	PHI:785	MGG_04128	318829	Magnaporthe_oryzae	reduced_virulence	70.7	529	146	5	3	523	23	550	0	761
SB1_chr06_pep_8061	A9QUB2	PHI:2403	CSN1	169388	Fusarium_solani	increased_virulence_(hypervirulence)__reduced_virulence	96.81	282	8	1	1	282	20	300	0	557
SB1_chr06_pep_8180	I1S5M1	PHI:5903	FGSG_12142	5518	Fusarium_graminearum	unaffected_pathogenicity	71.06	577	165	2	1	576	19	594	0	858
SB1_chr06_pep_8523	I1RFN8	PHI:1166	ATG15	5518	Fusarium_graminearum	reduced_virulence	81.73	591	103	2	1	586	46	636	0	938
SB1_chr13_pep_9106	O59928	PHI:144	CHT42	29875	Trichoderma_virens	reduced_virulence	59.78	363	138	2	1	357	23	383	2e-161	462
SB1_chr13_pep_9304	Q6WER3	PHI:432__PHI:4212__PHI:4242	FGL1__Fgl1	5518	Fusarium_graminearum	reduced_virulence	56.1	328	129	3	1	314	16	342	1e-131	381
SB1_chr13_pep_9402	O59928	PHI:144	CHT42	29875	Trichoderma_virens	reduced_virulence	55.37	363	128	5	1	331	23	383	5e-140	407
SB1_chr13_pep_9442	O59928	PHI:144	CHT42	29875	Trichoderma_virens	reduced_virulence	59.51	410	158	2	1	404	23	430	0	515
SB1_chr02_pep_9861	E3QFA7	PHI:10749	CLU5d_(GLRG_04689)	31870	Colletotrichum_graminicola	reduced_virulence	50.75	67	31	1	405	469	407	473	6e-14	72.8
SB1_chr02_pep_10174	Q9P470	PHI:257	GAS2	318829	Magnaporthe_oryzae	reduced_virulence	54.78	272	106	2	1	272	22	276	1e-88	268
SB1_chr02_pep_10600	G3F417	PHI:3703	Fvtox1	232082	Fusarium_virguliforme	reduced_virulence	91.5	153	13	0	1	153	20	172	5e-103	295
SB1_chr02_pep_10710	W7M3S4	PHI:7144	FvSCP1	117187	Fusarium_verticillioides	reduced_virulence	63.95	319	101	5	1	305	18	336	1e-131	380
SB1_chr02_pep_10737	I1RYH0	PHI:6409	FgCdc11	5518	Fusarium_graminearum	reduced_virulence	97.33	375	10	0	66	440	6	380	0	748
SB1_chr02_pep_10741	V9MGK6	PHI:4096	FoOCH1	5507	Fusarium_oxysporum	reduced_virulence	86.21	319	43	1	1	319	42	359	0	577
SB1_chr02_pep_10896	O59939	PHI:222	PELB	474922	Colletotrichum_gloeosporioides	reduced_virulence	66.29	264	86	2	33	295	68	329	1e-119	349
SB1_chr02_pep_11049	G4NA54	PHI:2214	Endo-1_4-beta-xylanase_I_[GH10_family]	318829	Magnaporthe_oryzae	reduced_virulence	68.45	187	59	0	2	188	43	229	1e-92	277
SB1_chr14_pep_11403	O59928	PHI:144	CHT42	29875	Trichoderma_virens	reduced_virulence	59.51	410	158	2	1	404	23	430	0	515
SB1_chr14_pep_11440	O59928	PHI:144	CHT42	29875	Trichoderma_virens	reduced_virulence	59.76	410	157	2	1	404	23	430	0	517
SB1_chr14_pep_11511	Q9C1F9	PHI:566	Cel2	5017	Bipolaris_zeicola	unaffected_pathogenicity	53.87	401	174	8	1	397	18	411	3e-145	423
SB1_chr14_pep_11758	O59928	PHI:144	CHT42	29875	Trichoderma_virens	reduced_virulence	56.02	407	174	4	4	407	25	429	1e-167	479
SB1_chr14_pep_11887	O59928	PHI:144	CHT42	29875	Trichoderma_virens	reduced_virulence	58.13	363	143	3	1	356	23	383	8e-154	442
SB1_chr08_pep_12034	I1RXJ5	PHI:9242	Fghyd3_(FGSG_09066)	5518	Fusarium_graminearum	reduced_virulence	64.41	59	21	0	3	61	24	82	5e-21	79
SB1_chr08_pep_12043	G4MQW5	PHI:7320	GH18	318829	Magnaporthe_oryzae	unaffected_pathogenicity	57.25	393	154	7	10	391	44	433	8e-158	454
SB1_chr08_pep_12059	G4NCF7	PHI:2138	SGA1	318829	Magnaporthe_oryzae	unaffected_pathogenicity__loss_of_pathogenicity	53.27	107	46	2	252	354	542	648	9e-27	110
SB1_chr08_pep_12260	G4NGA7	PHI:2032	VTL1	318829	Magnaporthe_oryzae	unaffected_pathogenicity	53.82	498	226	2	20	516	42	536	0	573
SB1_chr08_pep_12266	W6ZBM1	PHI:4989	Ppt1	101162	Bipolaris_oryzae	reduced_virulence	50.71	282	129	4	8	279	28	309	8e-101	301
SB1_chr08_pep_12431	Q8J0H8	PHI:7228	Tre1	318829	Magnaporthe_oryzae	unaffected_pathogenicity	66.12	670	220	3	1	664	23	691	0	945
SB1_chr08_pep_12977	Q04701	PHI:179	PELA	169388	Fusarium_solani	reduced_virulence	67.43	218	68	2	1	218	28	242	1e-102	299
SB1_chr08_pep_13068	K9G4Z7	PHI:10923	PDIG_23520_(Sca)	36651	Penicillium_digitatum	unaffected_pathogenicity__increased_virulence_(hypervirulence)	62.02	129	48	1	1	129	20	147	1e-51	162
SB1_chr10_pep_13388	A7F946	PHI:2411	Ss-ggt1	5180	Sclerotinia_sclerotiorum	reduced_virulence	57.53	365	145	3	205	560	130	493	2e-138	413
SB1_chr10_pep_13506	A0A0N9DQW5	PHI:10255	VmXyl1	105487	Valsa_mali	reduced_virulence	57.26	365	141	3	1	365	20	369	4e-139	414
SB1_chr10_pep_14040	I1RDW3	PHI:9245	Fghyd5_(FGSG_01831)	5518	Fusarium_graminearum	reduced_virulence__unaffected_pathogenicity	85.14	74	11	0	1	74	25	98	7e-45	141
SB1_chr10_pep_14074	I1RHQ4	PHI:5898	FGSG_03315	5518	Fusarium_graminearum	unaffected_pathogenicity	76.94	386	87	1	8	393	25	408	0	600
SB1_chr04_pep_14131	A0A194W2D2	PHI:10223	FAEC3_(VM1G_06347)	105487	Valsa_mali	unaffected_pathogenicity	61.49	470	175	4	1	465	31	499	0	607
SB1_chr04_pep_14138	A0A2H3U592	PHI:11257	FoMep1	5507	Fusarium_oxysporum	reduced_virulence	73.25	243	63	2	4	246	35	275	2e-135	385
SB1_chr04_pep_14357	I1RPX8	PHI:1581	GzOB021	5518	Fusarium_graminearum	unaffected_pathogenicity	53.63	248	114	1	1	248	27	273	3e-93	281
SB1_chr04_pep_14432	E3QHX9	PHI:6227	KRE5	31870	Colletotrichum_graminicola	reduced_virulence	64.29	1473	473	8	2	1426	25	1492	0	1968
SB1_chr04_pep_14493	A0A0D2XVZ5	PHI:5236	Dnj1	5507	Fusarium_oxysporum	reduced_virulence	80	500	94	3	1	494	22	521	0	827
SB1_chr04_pep_14759	G2WWK9	PHI:2712	NLP2	27337	Verticillium_dahliae	reduced_virulence	67.45	212	67	1	1	210	28	239	1e-95	281
SB1_chr04_pep_15195	O60038	PHI:1034	Cpcat1	5111	Claviceps_purpurea	unaffected_pathogenicity	76.21	681	158	3	2	681	37	714	0	1088
SB1_chr04_pep_15465	I1RR94	PHI:6122__PHI:5741	FGSG_06610__ScOrtholog_YKL153W	5518	Fusarium_graminearum	reduced_virulence	77	626	116	2	2	627	21	618	0	995
SB1_chr04_pep_15480	A0A384JWC5	PHI:10367	BcBGL3_(BCIN_10g05590)	40559	Botrytis_cinerea	reduced_virulence	65.92	851	270	9	19	864	56	891	0	1154
SB1_chr04_pep_15519	I1RR60	PHI:5899	FGSG_06572	5518	Fusarium_graminearum	unaffected_pathogenicity	72.65	852	233	0	14	865	29	880	0	1320
SB1_chr04_pep_15552	L2FHG9	PHI:3972	CDA	474922	Colletotrichum_gloeosporioides	unaffected_pathogenicity	64.46	363	122	2	12	367	22	384	3e-175	499
SB1_chr04_pep_15679	G4MTF8	PHI:2204	Endo-1_4-beta-xylanase_[GH10_family]	318829	Magnaporthe_oryzae	reduced_virulence	68.98	303	94	0	1	303	29	331	1e-149	426
SB1_chr04_pep_15721	Q0E7H5	PHI:2341	BeNEP1	278938	Botrytis_elliptica	unaffected_pathogenicity	59.17	218	86	1	1	218	32	246	2e-91	271
SB1_chr03_pep_15907	Q6WER3	PHI:432__PHI:4212__PHI:4242	FGL1__Fgl1	5518	Fusarium_graminearum	reduced_virulence	56.79	324	126	2	5	314	19	342	2e-131	381
SB1_chr03_pep_15949	G8AA67	PHI:2476	CcpelA	27358	Colletotrichum_coccodes	reduced_virulence__increased_virulence_(hypervirulence)	77.63	295	66	0	1	295	31	325	3e-168	473
SB1_chr03_pep_16000	L7JCL9	PHI:10459	Gtb1	318829	Magnaporthe_oryzae	reduced_virulence	62.38	529	195	3	2	529	23	548	0	681
SB1_chr03_pep_16012	G4N4F9	PHI:2166__PHI:6390	CBP1	318829	Magnaporthe_oryzae	unaffected_pathogenicity	61.11	36	14	0	32	67	415	450	7e-08	51.6
SB1_chr03_pep_16442	I1RW12	PHI:5890	FGSG_08464	5518	Fusarium_graminearum	unaffected_pathogenicity	60.37	429	164	2	10	432	20	448	2e-180	514
SB1_chr03_pep_16662	E3QFA6	PHI:10751	CLU5c_(GLRG_04688)	31870	Colletotrichum_graminicola	unaffected_pathogenicity	65.81	272	93	0	1	272	20	291	2e-133	382
SB1_chr03_pep_16663	E3QFA7	PHI:10749	CLU5d_(GLRG_04689)	31870	Colletotrichum_graminicola	reduced_virulence	65.87	208	69	1	63	270	67	272	2e-88	281
SB1_chr15_pep_17808	T2C7K6	PHI:3226	Pnl1	36651	Penicillium_digitatum	reduced_virulence	58.79	347	139	2	1	347	20	362	3e-134	390
SB1_chr15_pep_17814	Q5XTQ4	PHI:541	LIP1	40559	Botrytis_cinerea	unaffected_pathogenicity	56.7	552	231	4	1	547	20	568	0	630
SB1_chr15_pep_17856	A0A194W2D2	PHI:10223	FAEC3_(VM1G_06347)	105487	Valsa_mali	unaffected_pathogenicity	53.5	471	212	5	4	468	28	497	4e-176	532

## Sheet: Supp Table 3
Supplementary Table 3. Information on Fusarium solani strains used in pan-genome analysis
Strain	NCBI Accession No.	Size (Mb)	N50 (Mb)	L50	GC%	Proteins	Gene Density per Mb	Repeats	Genome Completeness (%, proteins)	Source	Lifestyle	Origin	Reference
Fvan 77-13-4	GCA_000151355	54.43	1.3	10	50.8	15705	307	5.1	99.3	Pea (Pisum sativum)	Pathogenic	USA	Unpublished at time of study
FSSC 5 MPI-SDFR-AT-0091	GCA_020744495.1	52.93	2.2	9	51	17654	334	5.76	99.7	Healthy Arabidopsis plant	Endophytic	Germany	Mesny et. al, 2021
SB1	GCA_023522795.1	59.38	4	6	50.5	17989	303	10.71	98.5	Galled sugarbeet (Beta vulgaris)	Opportunistic	USA	Navasca et al., 2023; this study
NK-NH1	GCA_033085375.1	52.39	3.9	6	51.5	16644	318	6.79	99.5	Hull wood of Nanhai NO.1 Shipwreck	Saprophytic	China	Unpublished at time of study
CR12	GCA_030014125.1	66.64	3.5	8	49.5	18410	276	17.45	98.9	Root of Ginkgo biloba	Nd	China	Unpublished at time of study
JS-169	GCA_002215905.1	45.81	2.6	6	50	14663	320	6.41	95.6	Twig of Mulberry (Morus alba)	Endophytic	South Korea	Kim et al., 2017
2024-01-01	GCA_019320015.1	51.83	2	9	51.5	16772	324	5.31	97.1	Broodstock of Fannabin prawns (Penaeus vannamei)	Pathogenic	China	Unpublished at time of study
IISc-1	GCA_013168735.1	48.7	1.6	9	50.5	16197	333	3.26	99.5	Stem cuttings of evergreen (Taxus celebica)	Endophytic	India	Unpublished at time of study
Karbala-1	GCA_024220475.1	51.65	780.4 Kb	19	51.5	17036	330	3.75	99.3	Cockscomb (Celosia argentea L.)	Pathogenic	Iraq	Shehan et al., 2023
A01-1	GCA_027945525.1	54.73	373.3 Kb	44	50.5	17956	328	6.64	99.6	Root/soil of sweet orange (Citrus sinensis)	Symbiont	USA	Unpublished at time of study
F2	GCA_029603225.1	55.15	357.9 Kb	47	50.5	17654	320	7.45	99.2	Rhizosphere soil of Chinese ginseng (Panax notoginseng)	Nd	China	Unpublished at time of study
GU-3	GCA_027574645.1	53.84	186.6 Kb	80	51.5	17879	332	4.48	99.6	Chinese liquorice (Glycyrrhiza uralensis)	Nd	China	Unpublished at time of study

## Sheet: Supp Table 4
Supplementary Table 4. Core, Accessory, and Unique Genes of Fusarium solani strains
Genome	Genes
	Core	Accessory	Unique
Fvan	11254	4311	140
Fusso	11333	5884	437
2024-01-01	11202	5471	99
A01-1	11910	5464	582
CR12	11660	6309	441
F2	11317	5906	97
GU-3	11475	6012	392
IISc-1	11279	4628	290
JS-169	11141	3127	395
Karbala-1	11236	5671	129
NK-NH1	11350	5051	243
SB1	11388	6417	184

## Sheet: Supp Table 5
Supplementary Table 5. Orthologous Genes of Fusarium solani Pangenome
Description	Fvan	FSSC 5	2024-01-01	A01-1	CR12	F2	GU-3	IISc-1	JS-169	Karbala-1	NK-NH1	SB1
Number of genes	15705	17654	16772	17956	18410	17320	17879	16197	14663	17036	16644	17989
Number of genes in orthogroups	15600	17240	16686	17429	18055	17227	17574	15912	14281	16948	16435	17858
Number of unassigned genes	105	414	86	527	355	93	305	285	382	88	209	131
Percentage of genes in orthogroups	99.3	97.7	99.5	97.1	98.1	99.5	98.3	98.2	97.4	99.5	98.7	99.3
Percentage of unassigned genes	0.7	2.3	0.5	2.9	1.9	0.5	1.7	1.8	2.6	0.5	1.3	0.7
Number of orthogroups containing species	14528	15895	15502	15337	15526	15847	15662	14902	13513	15743	15086	15880
Percentage of orthogroups containing species	75.2	82.3	80.3	79.4	80.4	82	81.1	77.2	70	81.5	78.1	82.2
Number of species-specific orthogroups	11	10	6	23	38	2	38	2	6	17	15	20
Number of genes in species-specific orthogroups	35	23	13	55	86	4	87	5	13	41	34	53
Percentage of genes in species-specific orthogroups	0.2	0.1	0.1	0.3	0.5	0	0.5	0	0.1	0.2	0.2	0.3
Ratio (Number of genes in orthogroups / Number of orthogroups containing species)	1.07	1.08	1.08	1.14	1.16	1.09	1.12	1.07	1.06	1.08	1.09	1.12

## Sheet: Supp Method
Excerpt from Lifeasible Report (www.lifeasible.com): Project Number LZZ10142402
All the reagents were provided by Lifeasible as a part of service.
Chromosome Preparation:
1. Added colchicine to synchronize cells
2. Treated cells with Cellulase.
3. Added a hypotonic solution to the cells
4. After hypotonic treatment, added a fixative for pre-fixation, then centrifuge and discard the supernatant.
5. Added fixative for the first fixation, centrifuge, and remove the supernatant.
6. Added fixative again for the second fixation, centrifuge, and remove the supernatant.
7. Dropped the remaining cells onto a slide
Banding and Staining:
1. Baked the slide at 75 °C.
2. Immersed the slide in Giemsa stain working solution for staining after banding
3. Rinsed gently with the water and examine under a microscope once dried
Microscope Photograpy and karyotype analysis:
1. Adjusted the microscope and place the slide on the stage. Use a 10x objective lens to locate the chromosome karyotype field of view
2. Used an oil immersion lens (Olympus BX41) for observation and photography
3. Conducted chromosome counting and sorting, and karyotype analysis
4. Karyotyping analysis done using propietary, in-house developed software, KTA-V3.0

## Sheet: Supp Figure 1
Supplementary Figure 1. Karyotyping results of F. solani SB1 showing roughly 16 chromosomes. Methods for karyotyping described in supplementary method.
